# Supplementary material for: Protection of Cattle against Epizootic Bovine Abortion (EBA) Using a Live Pajaroellobacter abortibovis Vaccine
Source: MDPI journal article supplement (doi:10.3390/vaccines10020335), 2022-02-19
Supplement: s1 [file s1]

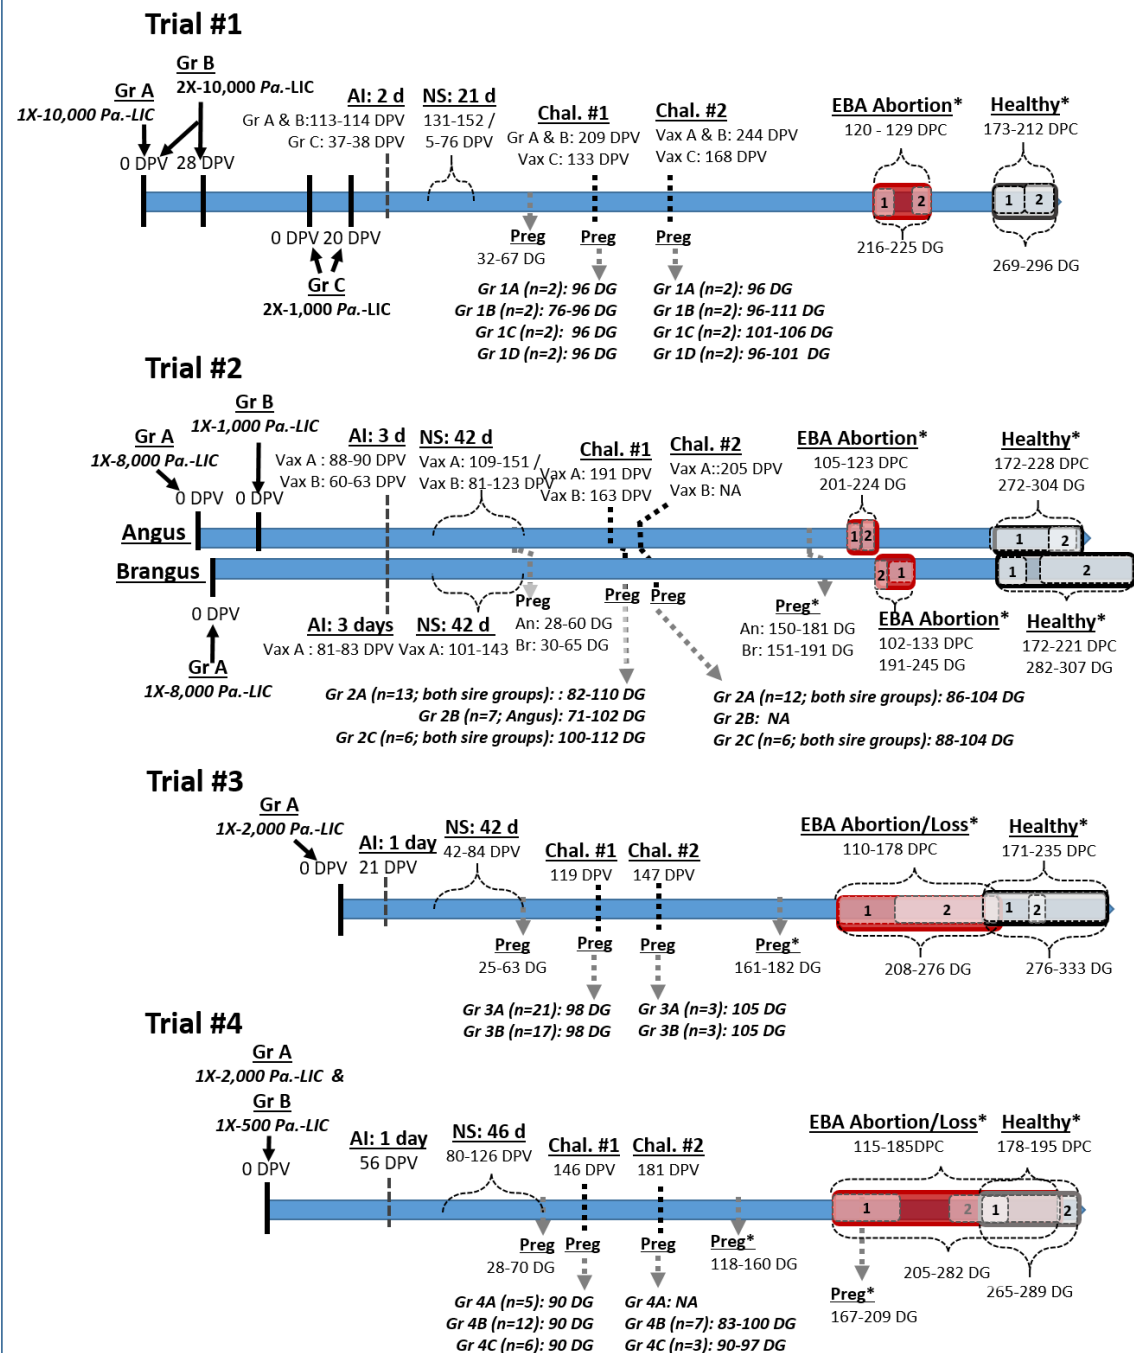

**Figure S1.** Experimental timeline of vaccination, breeding by either artificial insemination (AI) or natural bull service (NS), pregnancy examinations (Preg), *Pajaroellobacter abortibovis* challenge (Chal), abortions/calf losses and healthy births for each of 4 efficacy trials. Temporal references include days post-vaccination (DPV), days post-challenge (DPC) and days fetal gestation (DG). Abortions due to EBA (EBA Abortion), losses from other causes (Losses) and full-term healthy calves (Healthy) are noted for challenged animals only(\*). Boxes within "EBA Abortions/Losses" and "Healthy" calving illustrate the timing of these events in challenge groups 1 vs. 2. Trial timelines are to relative scale and aligned at time of artificial insemination (AI) for better visual reference to varying intervals between vaccination and breeding.
